# Supplementary material for: Experiences of People with Diabetes by Payer Type: An Analysis of the Roper Diabetes Data Set
Source: PubMed Central journal article supplement — Diabetes Ther. 2015 May 22;6(2):113–25. doi: 10.1007/s13300-015-0109-z (PMC4478175; doi:10.1007/s13300-015-0109-z), 2015-05-22
Supplement: 13300_2015_109_MOESM1_ESM.pdf [file 13300_2015_109_MOESM1_ESM.pdf]

- Patient reported outcomes of people with diabetes show significant variation based on the patients socioeconomic status and personal health insurance coverage.
- Medicaid patients reported higher rates of disability, depression, and comorbidities than patients with Medicare or private insurance, as well as significant economic challenges resulting in difficulties treating their diabetes.
- Medicaid patients also report different ways of accessing information and different means of intervention than the other two groups
- In order to best serve this diverse population, these differences must be accounted for by those providing interventions to people with diabetes.

This summary slide represents the opinions of the authors. Sponsorship for this study was funded by GfK. For a full list of acknowledgments and conflicts of interest for all authors of this article, please see the full text online. Copyright © The Authors 2015. Creative Commons Attribution Noncommercial License (CC BY-NC).
